# Supplementary material for: Microwave-antenna induced in situ synthesis of Cu nanowire threaded ZIF-8 with enhanced catalytic activity in H2production
Source: Royal Society of Chemistry journal article supplement (doi:10.1039/c5nr07505j), 2016-01-01
Supplement: c5nr07505j1.pdf [file c5nr07505j1.pdf]

## Supporting Information

### **Microwave-antenna induced *in situ* synthesizing Cu nanowires threaded ZIF-8 with enhanced catalytic activity in H<sub>2</sub> production**

Dieqing Zhang,<sup>a</sup> Peijue Liu,<sup>a,b</sup> Shuning Xiao,<sup>a</sup> Xufang Qian,<sup>b</sup> Hui Zhang,<sup>a</sup> Meicheng Wen,<sup>b</sup> Yasutaka Kuwahara,<sup>b,c</sup> Kohsuke Mori,<sup>b,c</sup> Hexing Li,<sup>\*,a</sup> and Hiromi Yamashita,<sup>\*,b,c</sup>

Table S1 Structural parameters of CuNWs/ZIF-8 and ZIF-8.

| Sample | Zn ratio (wt%) | ZIF-8 ratio (wt%) | S <sub>BET</sub> (m <sup>2</sup> /g) | V <sub>p</sub> (cm <sup>3</sup> /g) |
|--------|----------------|-------------------|--------------------------------------|-------------------------------------|
| CZ1    | 0.020          | 19.2              | 1044                                 | 0.052                               |
| CZ2    | 0.0015         | 12.9              | 288                                  | 0.070                               |
| CZ3    | 0.0013         | 11.1              | 149                                  | 0.072                               |
| CZ4    | 0.0012         | 10.0              | 89                                   | 0.075                               |
| ZIF-8  | 0.032          | /                 | 1280                                 | 0.058                               |

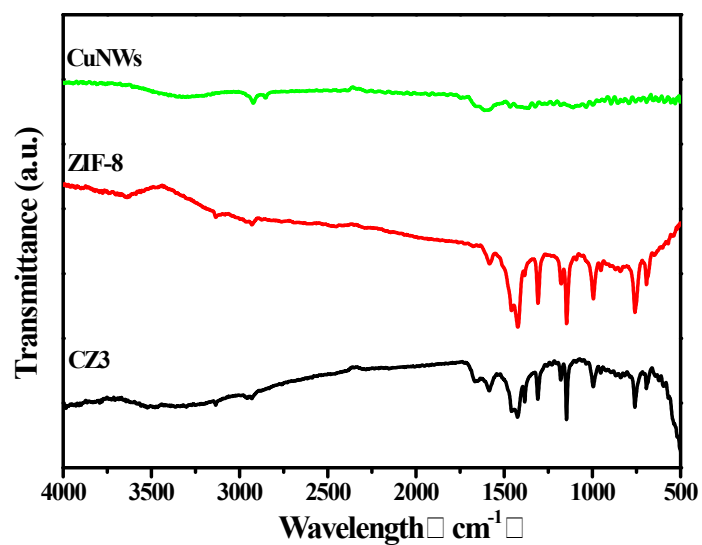

**Fig. S1** FTIR spectra of CuNWs, ZIF-8 and CuNWs/ZIF-8 (CZ3).

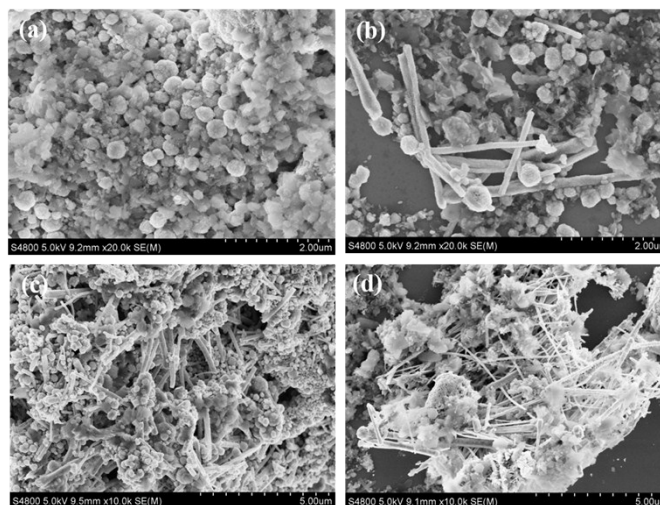

**Fig. S2** FESEM images of (a) CZ1-H, CZ2-H, CZ3-H and CZ4-H prepared by hydrothermal treatment.

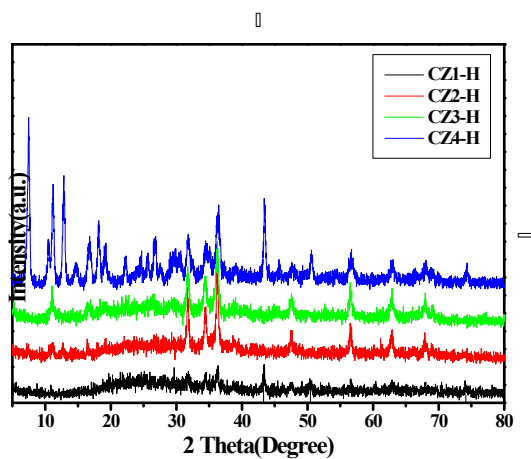

**Fig. S3** XRD patterns of CuNWs/ZIF-8 prepared by hydrothermal treatment

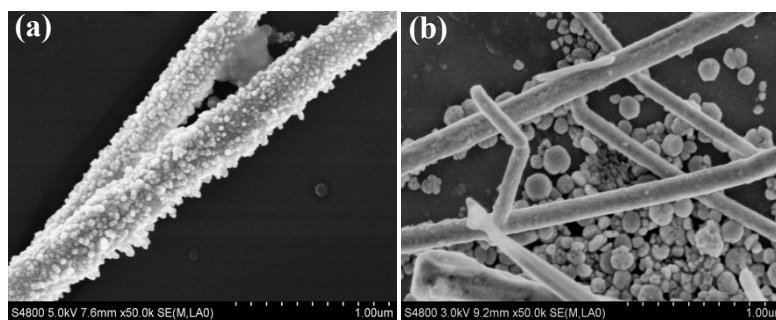

**Fig. S4** FESEM of (a) CZ3 and (b) CZ3 synthesized without PVP

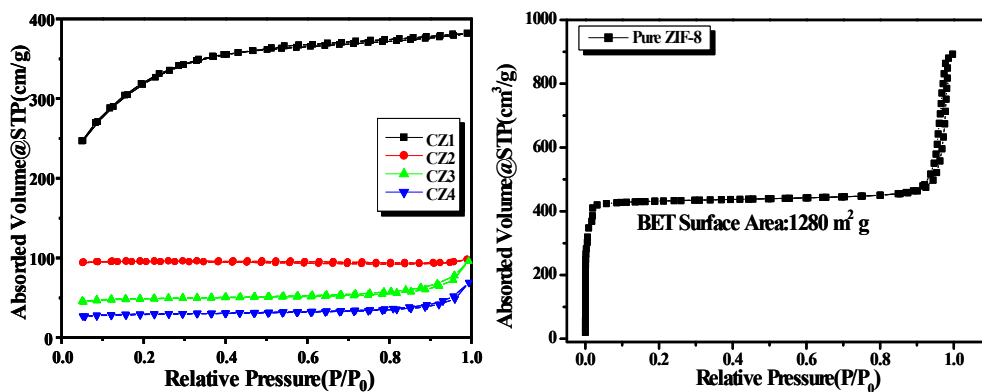

**Fig. S5** N<sub>2</sub> adsorption-desorption isotherms of CuNWs/ZIF-8 and ZIF-8.

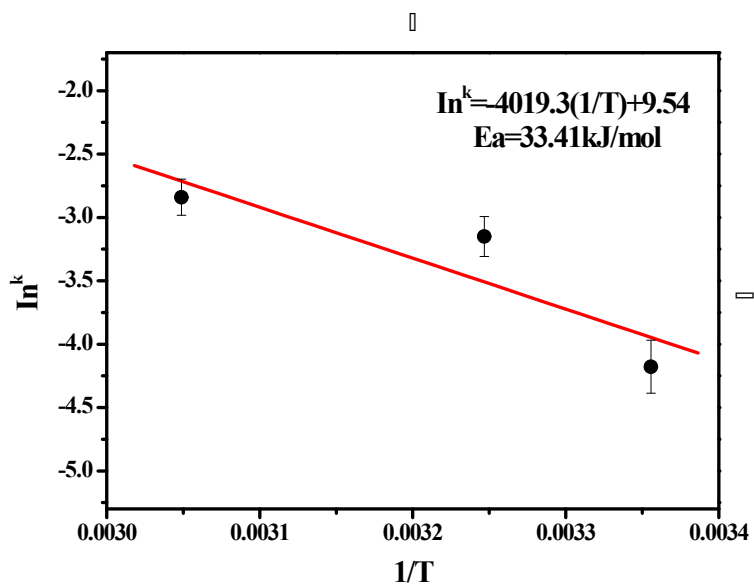

**Fig. S6** The Arrhenius plot ( $\ln k$  vs.  $1/T$ ).

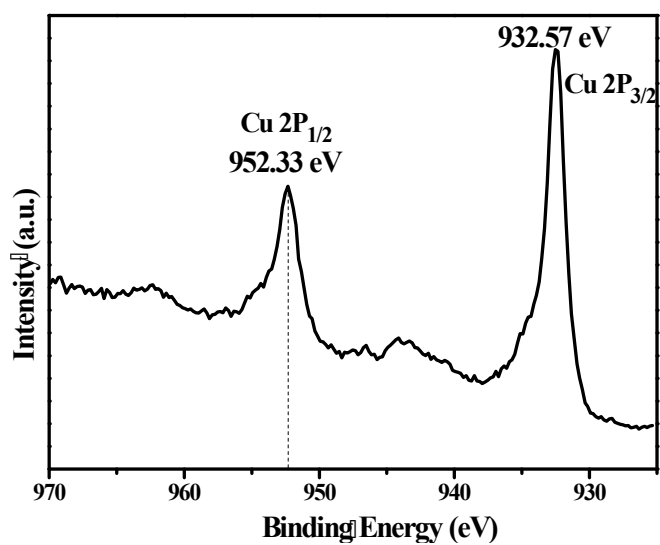

**Fig. S7** The Cu 2p XPS spectrum of CZ3 sample.

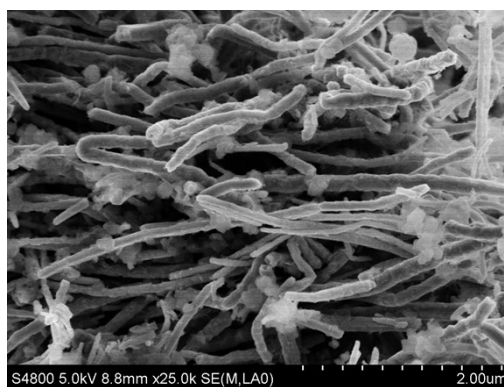

**Fig. S8** FESEM image of CuNWs@ZIF-8 after reused for three times in  $\text{NH}_3\text{BH}_3$  hydrolysis reaction. Reaction conditions are given in Figure 6.
